# Supplementary material for: Predicting binding sites from unbound versus bound protein structures
Source: PubMed Central journal article supplement (PMC7522209; doi:10.1038/s41598-020-72906-7), 2020-09-28

*Supplementary Information:*

**Predicting Binding Sites from Unbound vs. Bound Protein Structures**

Jordan J. Clark, Zachary J. Orban, & Heather A. Carlson\*

University of Michigan, Ann Arbor  
Department of Medicinal Chemistry  
College of Pharmacy, 428 Church Street, Ann Arbor MI 48109-1065

\*Corresponding author email: carlsonh@umich.edu

**File:** Supp\_Table\_S1.txt

**Table S1.** Tab separated file of the performance of the seven LBS-prediction methods across every individual protein structure used in this analysis. The P, R, F, and MCC values for all methods are given for every individual protein in our dataset. Proteins are annotated with their PDBid, their family number, whether they are apo or holo, and whether they also appear in the structures in CryptoSite.

**File:** Supp\_Table\_S2.txt

**Table S2.** Tab separated file of the performance of the seven LBS-prediction methods aggregated for every protein family used in this analysis. For the apo and holo proteins in each of the 304 protein families, average RMSDs for the whole structure and just the UBS are given. Also, the median MCC and median F scores are given for each method across each protein family. It is also noted whether the protein family's sequence has  $\geq 90\%$  sequence identity to the structures in CryptoSite.

**Figure S1.** Protein flexibility across each family compared to F score. Family maximum global  $C_{\alpha}$  RMSD vs Family Median F score of apo and holo protein structures for A) Surfnet, B) Ghecom, C) LIGSITE<sub>esc</sub>, D) Fpocket, E) Depth, F) AutoSite, and G) Kalasanty.

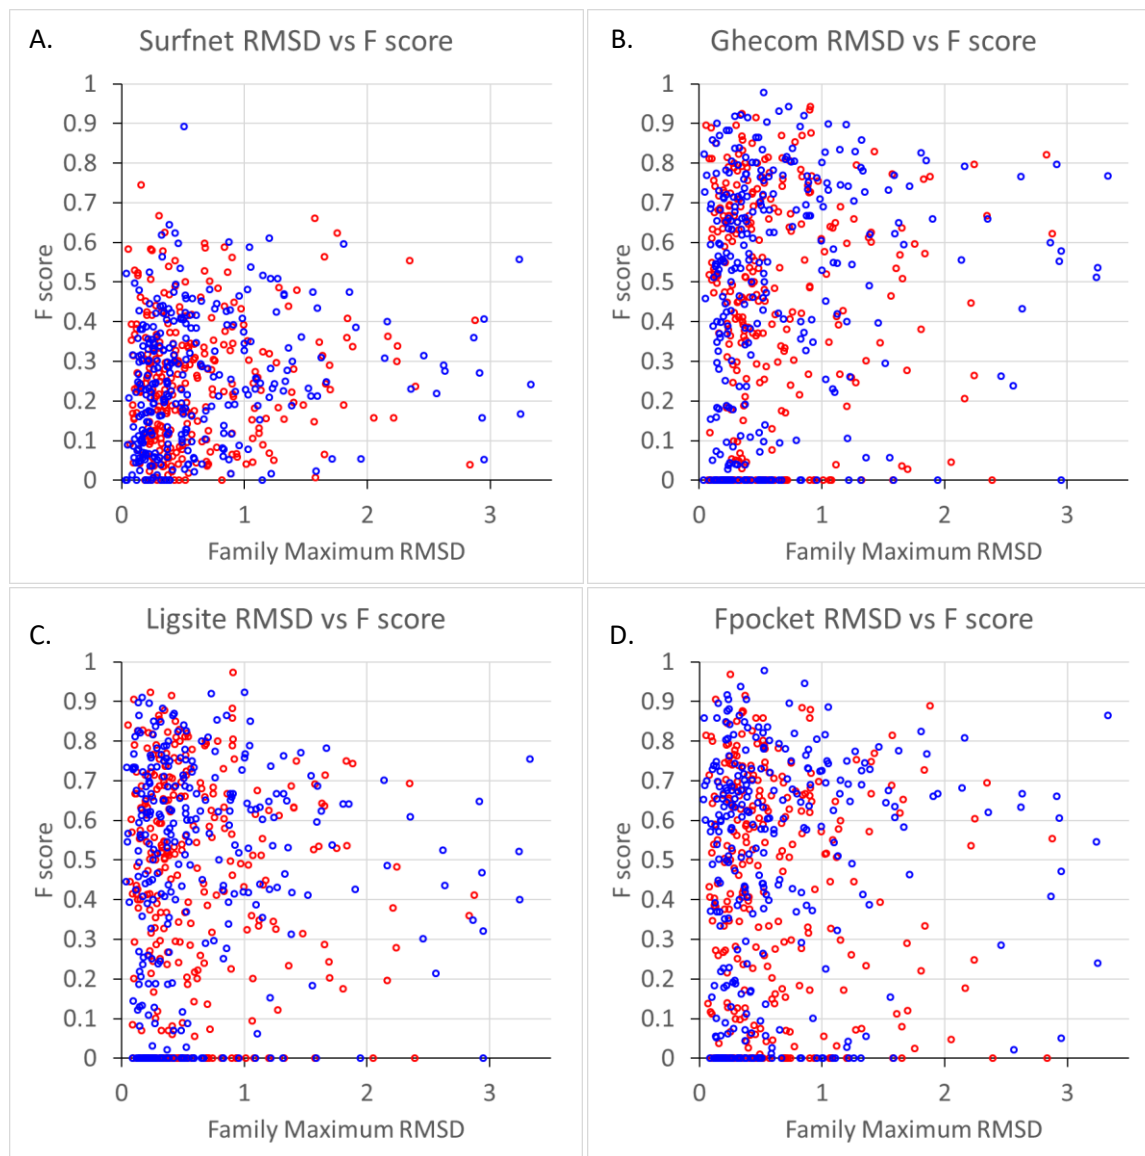

E. Depth RMSD vs F score

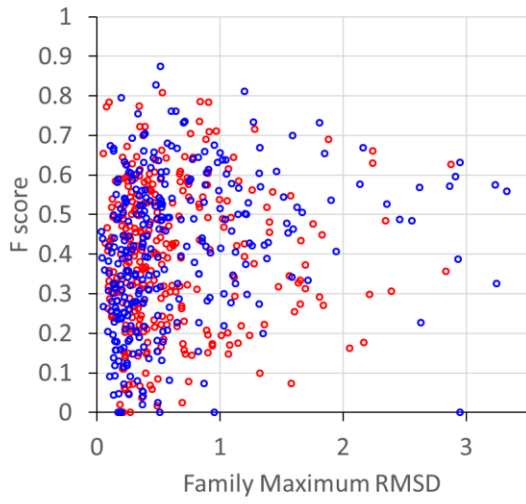

F. AutoSite RMSD vs F score

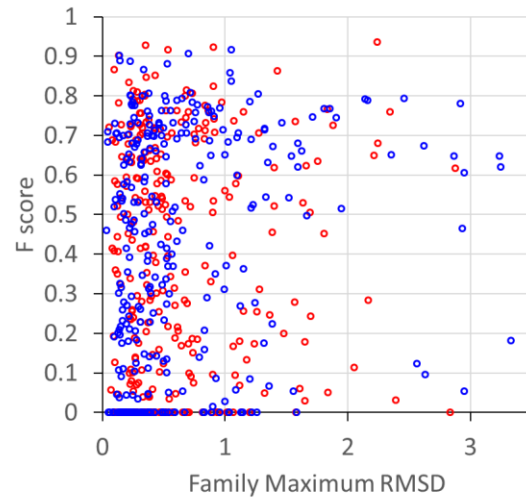

G. Kalasanty RMSD vs F score

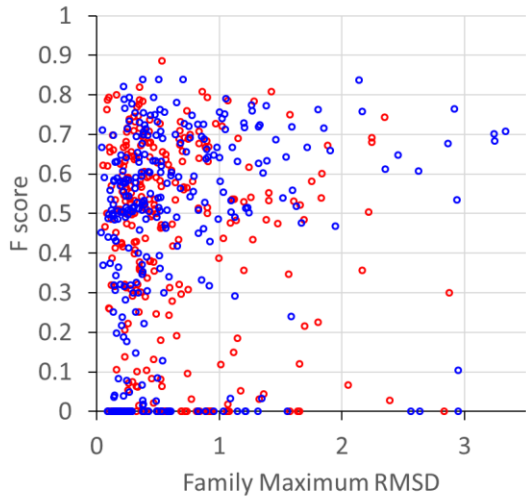

**Figure S2.** Protein flexibility across each family compared to MCC score. Family maximum global  $C_{\alpha}$  RMSD vs Family Median MCC of apo and holo protein structures for A) Surfnet, B) Ghecom, C) LIGSITE<sub>esc</sub>, D) Fpocket, E) Depth, F) AutoSite, and G) Kalasanty.

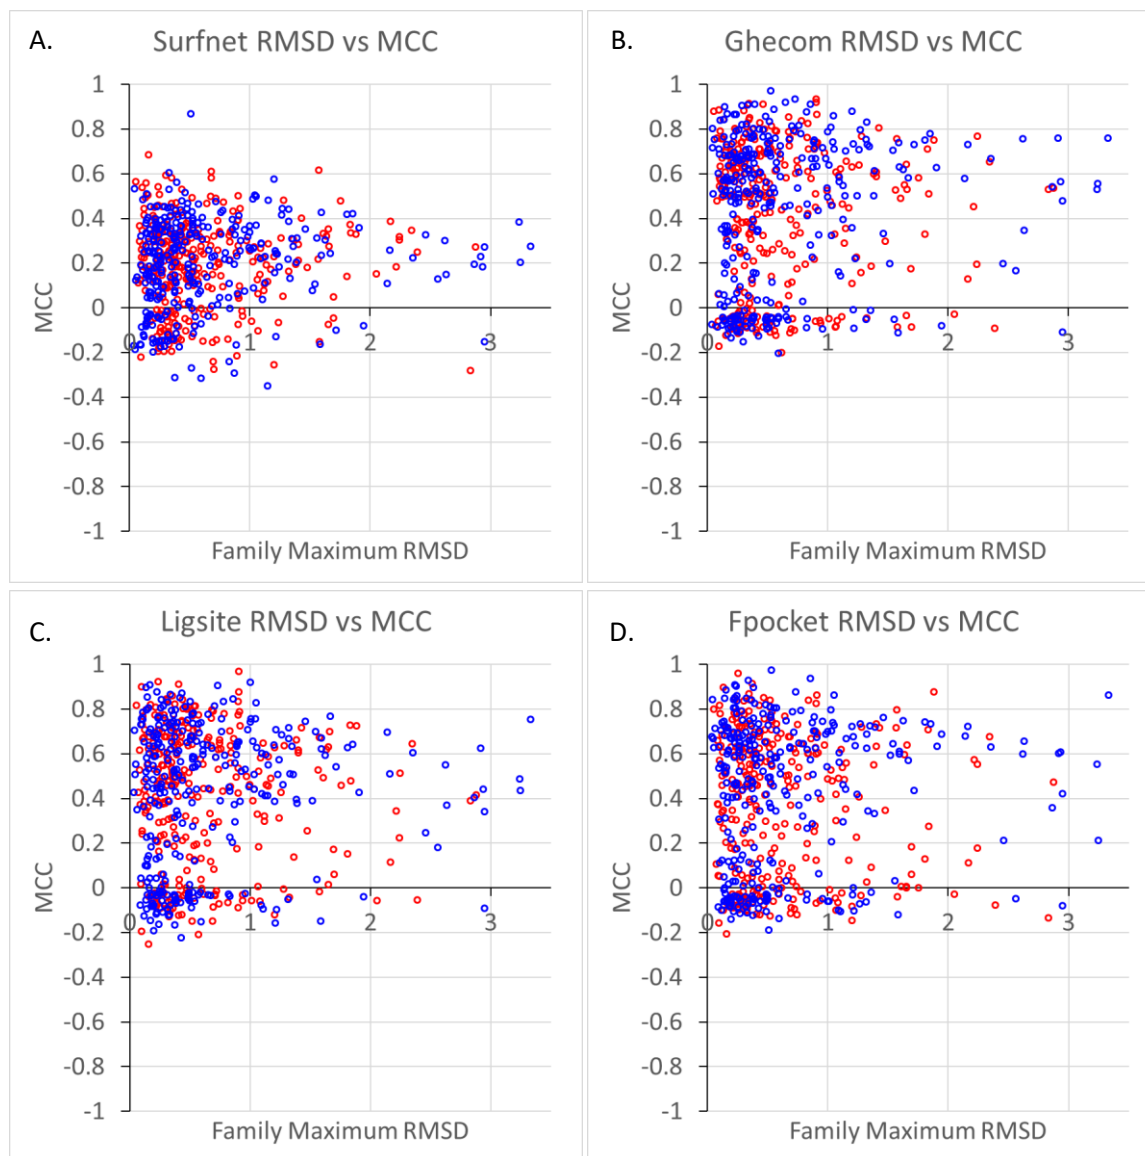

E.

Depth RMSD vs MCC

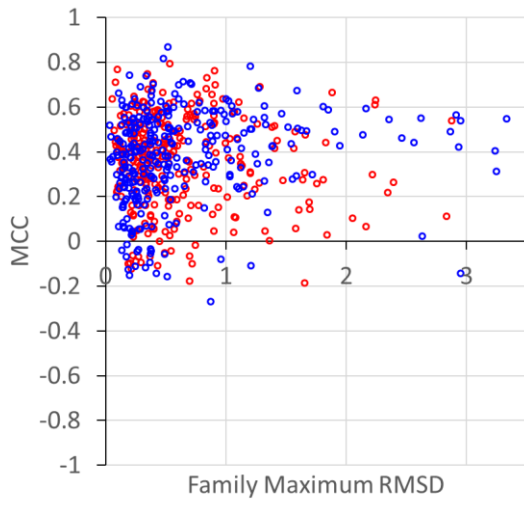

F.

AutoSite RMSD vs MCC

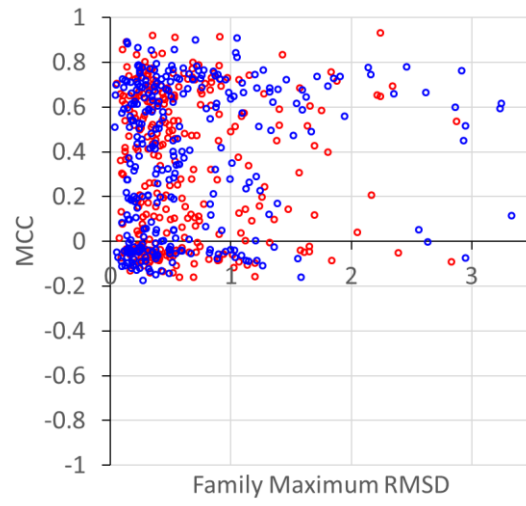

G.

Kalasanty RMSD vs MCC

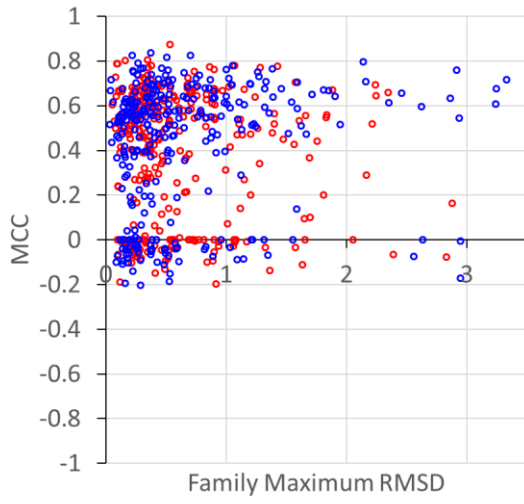

Supplement: 41598_2020_72906_MOESM1_ESM.pdf [file 41598_2020_72906_MOESM1_ESM.pdf]
